# Supplementary material for: Effects of transcriptional noise on estimates of gene and transcript expression in RNA sequencing experiments
Source: PubMed Central journal article supplement — Genome Res. 2021 Feb;31(2):301–8. doi: 10.1101/gr.266213.120 (PMC7849408; doi:10.1101/gr.266213.120), 2021-02
Supplement: supp_gr.266213.120_Supplemental_Fig_S3.pdf [file supp_gr.266213.120_Supplemental_Fig_S3.pdf]

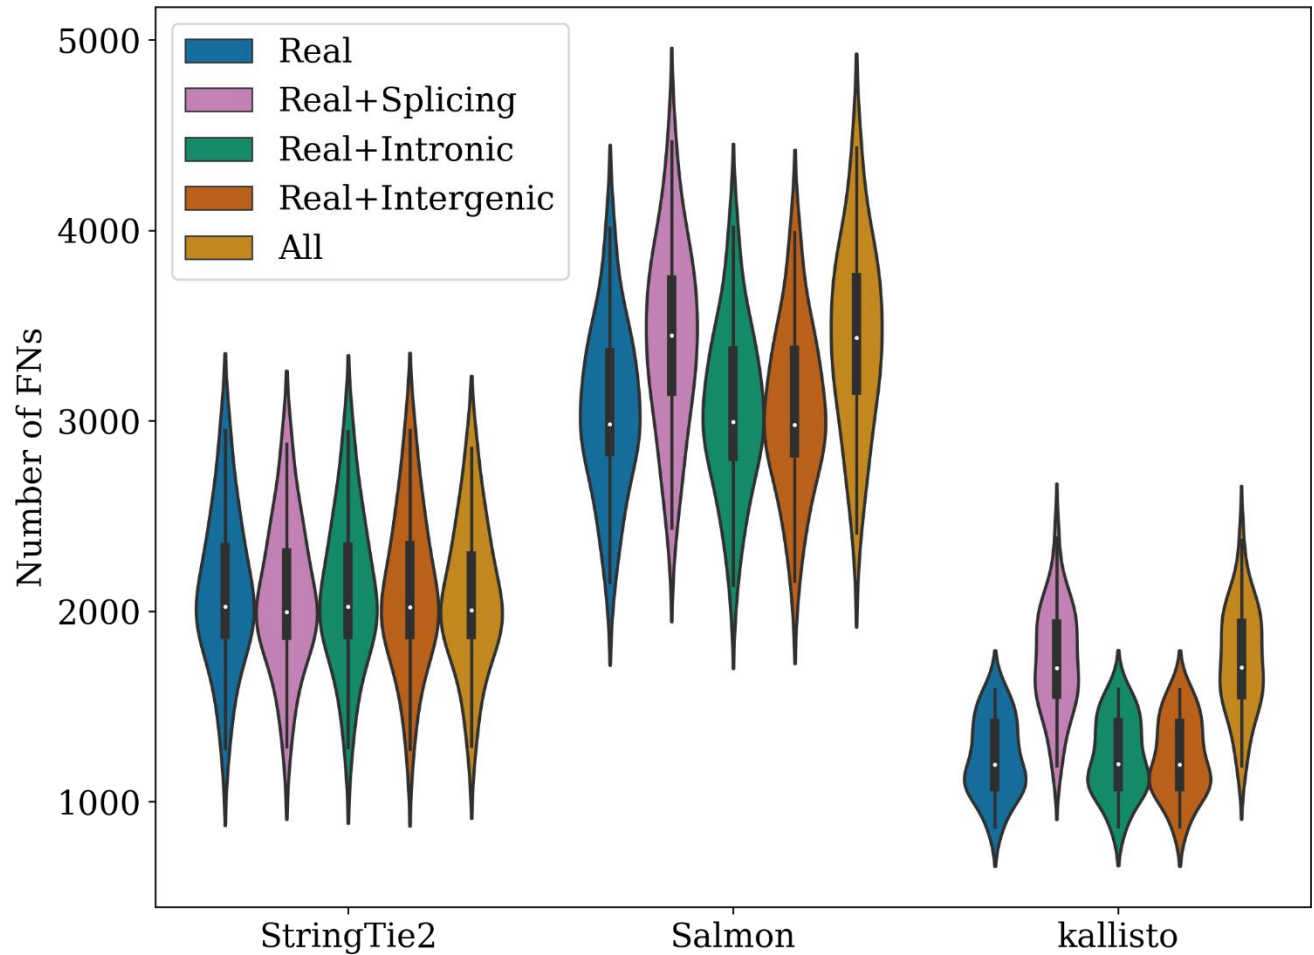

**Supplementary Figure 3.** *Number of False Negative transcript quantifications across 30 simulated samples representing 3 simulated tissues. Each method was evaluated separately for each combination of real and noisy reads. StringTie2 changed from 2,109 FNs in the absence of noise to 2,112 with intronic noise; 2,086 with splicing noise; 2,111 with intergenic noise; and 2,085 with all noise combined. Salmon changed from 3,061 FNs in the absence of noise to 3,065 with intronic noise; 3,439 with splicing noise; 3,063 with intergenic noise; and 3,439 with all noise combined. Kallisto changed from 1,233 FNs in the absence of noise to 1,234 with intronic noise; 1,740 with splicing noise; 1,233 with intergenic noise; and 1,741 with all noise combined.*
