# Supplementary material for: Effects of transcriptional noise on estimates of gene and transcript expression in RNA sequencing experiments
Source: PubMed Central journal article supplement — Genome Res. 2021 Feb;31(2):301–8. doi: 10.1101/gr.266213.120 (PMC7849408; doi:10.1101/gr.266213.120), 2021-02
Supplement: supp_gr.266213.120_Supplemental_Fig_S6.pdf [file supp_gr.266213.120_Supplemental_Fig_S6.pdf]

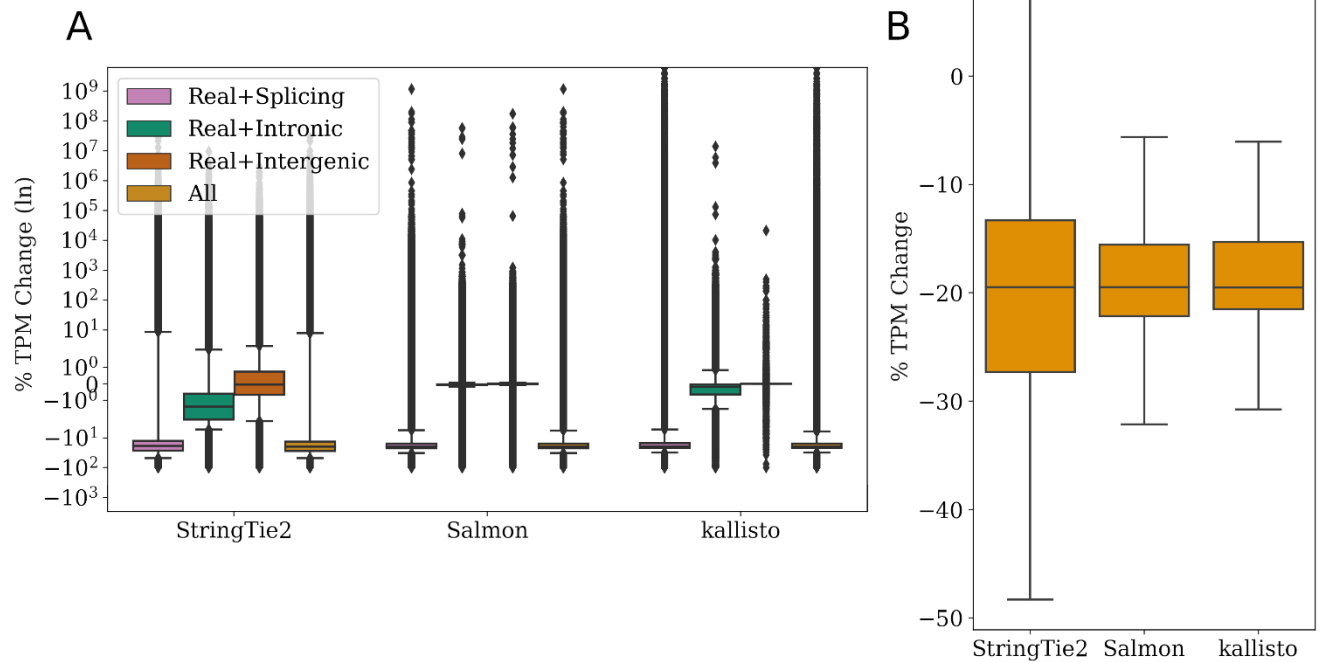

**Supplementary Figure 6.** *Percent change in abundance estimates after introduction of noise.*

*Fold change was measured relative to abundance estimates each method reported in the absence of noise. A. Percent change (TPM) shown for all types of noise with outliers on a log scale. StringTie2 decreased estimates of abundance by 18.62% with the addition of splicing noise; by 1.38% with the addition of intronic noise; by 0.03% with the addition of intergenic noise; and by 19.50% with all sources of noise combined. Salmon decreased estimates of abundance by 19.1% with the addition of splicing noise; by 0.05% with the addition of intronic noise; by 0.00% with the addition of intergenic noise; and by 19.48% with all sources of noise combined. Kallisto decreased estimates of abundance by 19.01% with the addition of splicing noise; by 0.18% with the addition of intronic noise; by 0.00% with the addition of intergenic noise; and by 19.5% with all sources of noise combined. B. Percent change in abundance (TPM) on a linear scale (outliers removed), observed in the presence of all types of noise combined.*
