# Supplementary material for: Effects of transcriptional noise on estimates of gene and transcript expression in RNA sequencing experiments
Source: PubMed Central journal article supplement — Genome Res. 2021 Feb;31(2):301–8. doi: 10.1101/gr.266213.120 (PMC7849408; doi:10.1101/gr.266213.120), 2021-02
Supplement: supp_gr.266213.120_Supplemental_Fig_S9.pdf [file supp_gr.266213.120_Supplemental_Fig_S9.pdf]

## False Positives

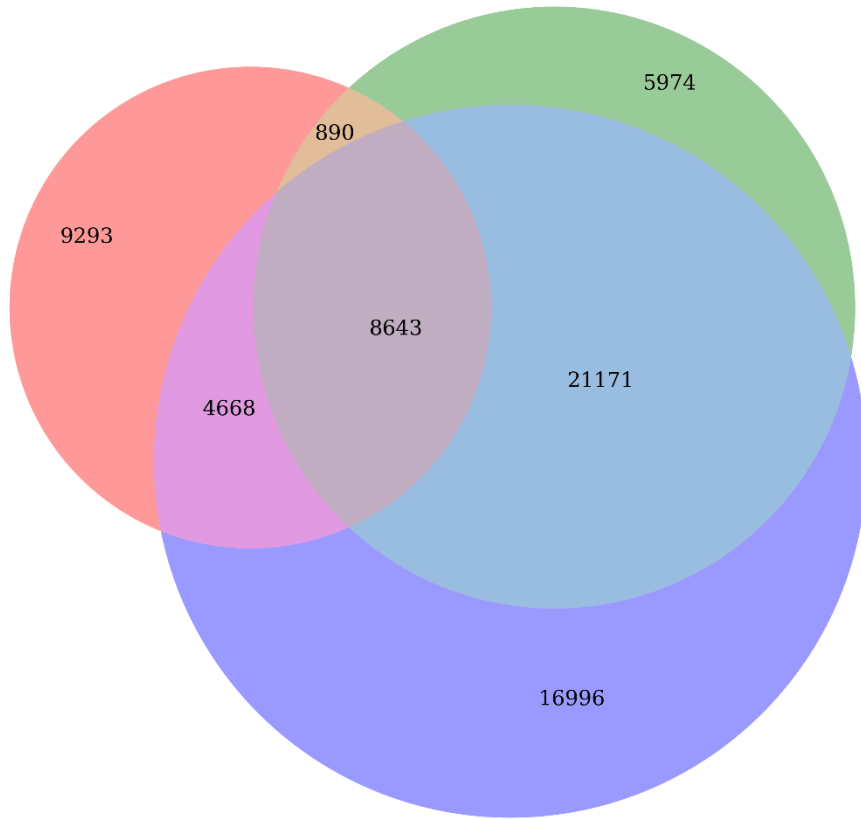

## False Negatives

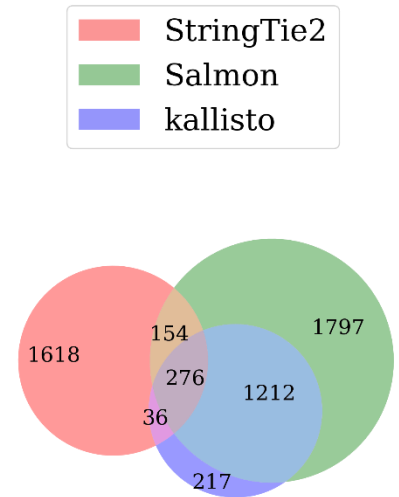

**Supplementary Figure 9. False transcript predictions.** *Overlaps between StringTie2, Salmon and Kallisto in reported FP and FN transcripts in the presence of splicing, intronic and intergenic noise. Average values are reported across 30 simulated experiments.*
