# Supplementary material for: Effects of transcriptional noise on estimates of gene and transcript expression in RNA sequencing experiments
Source: PubMed Central journal article supplement — Genome Res. 2021 Feb;31(2):301–8. doi: 10.1101/gr.266213.120 (PMC7849408; doi:10.1101/gr.266213.120), 2021-02
Supplement: supp_gr.266213.120_Supplemental_Fig_S11.pdf [file supp_gr.266213.120_Supplemental_Fig_S11.pdf]

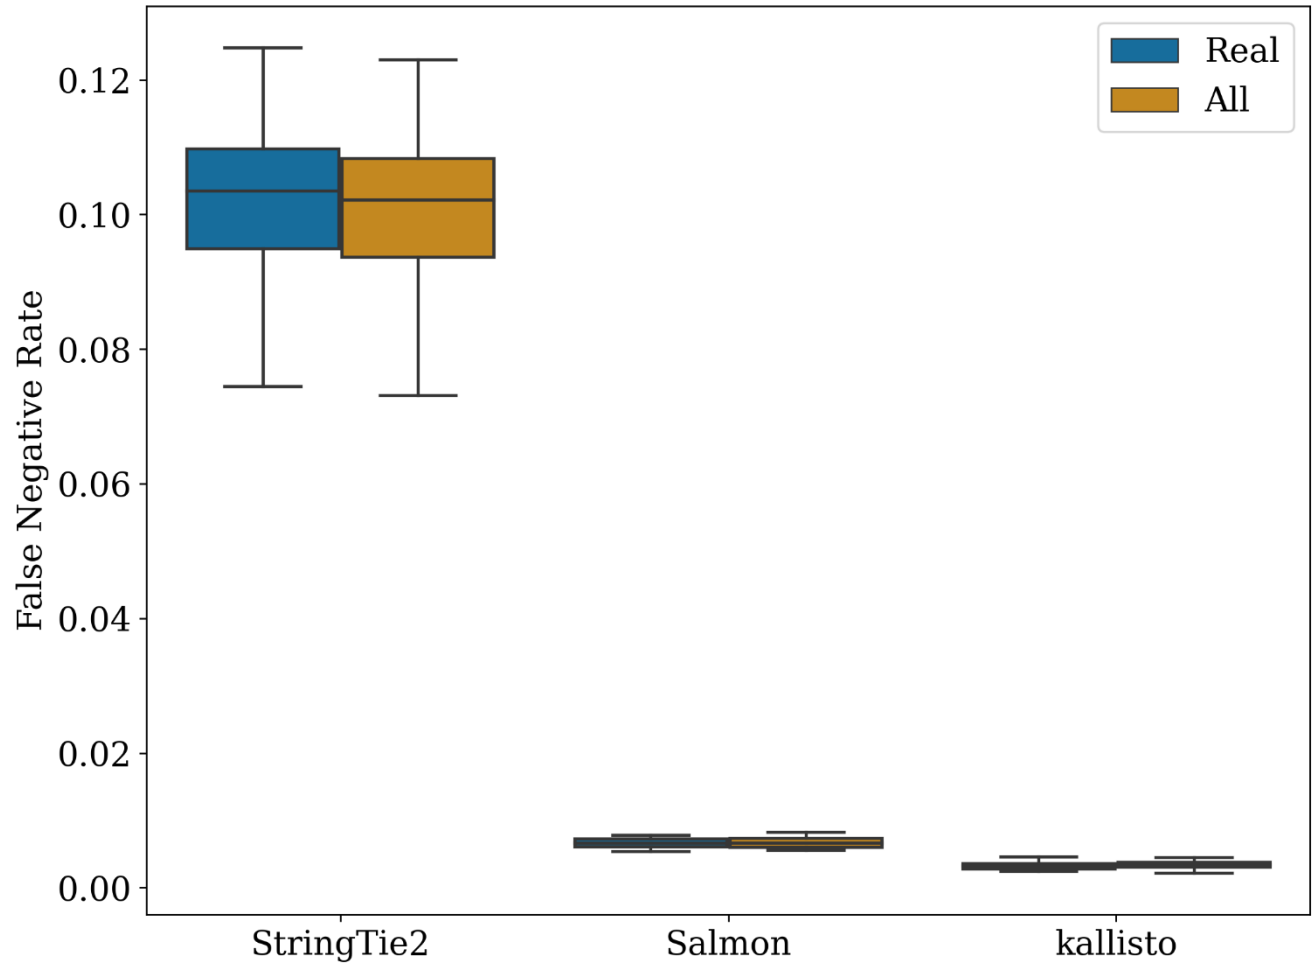

**Supplementary Figure 11.** *False Negative Rate (FNR) for **gene** quantifications across 30 simulated samples representing 3 simulated tissues. Each method was evaluated separately for each combination of real and noisy reads.*
