# Supplementary material for: Effects of transcriptional noise on estimates of gene and transcript expression in RNA sequencing experiments
Source: PubMed Central journal article supplement — Genome Res. 2021 Feb;31(2):301–8. doi: 10.1101/gr.266213.120 (PMC7849408; doi:10.1101/gr.266213.120), 2021-02
Supplement: supp_gr.266213.120_Supplemental_Fig_S13.pdf [file supp_gr.266213.120_Supplemental_Fig_S13.pdf]

### Observed non-expressed real (FP)

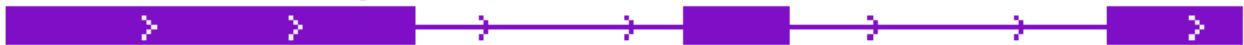

### Expressed real (TP)

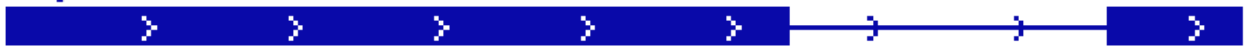

### Expressed splicing noise

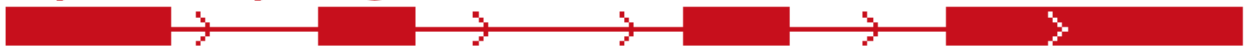

**Supplementary Figure 13.** *A cartoon example of a False Positive (FP) transcript. The figure is a simplification of a FP which occurs within CHS.57122 gene. All three evaluated methods reported the transcript in **purple** (non-expressed annotated isoform - FP), while only the structure in **blue** (annotated expressed isoform - TP) and structure in **red** (non-annotated expressed isoform - splicing noise) were simulated in the sample.*
